# Supplementary material for: Clinical and budget impacts of changes in oral anticoagulation prescribing for atrial fibrillation
Source: PubMed Central journal article supplement — Heart. 2020 Oct 28;107(1):47–53. doi: 10.1136/heartjnl-2020-317006 (PMC7788263; doi:10.1136/heartjnl-2020-317006), 2020-10-28

## Clinical and budget impact of temporal changes in oral anticoagulation for stroke prevention in atrial fibrillation: nationwide multisource health records study

Andrzej Orłowski, Chris P Gale, Rachel Ashton, Bruno Petrunaro, Ruth Slater, Ramesh Nadarajah, J Campbell Cowan, Jackie Buck, Wayne Smith, Jianhua Wu

**Table S1: Metrics for data extract from the Business Services Authorities electronic Prescribing and Costing Tool**

| Metrics           | Explanation                                                                                                                                                                                                 |
|-------------------|-------------------------------------------------------------------------------------------------------------------------------------------------------------------------------------------------------------|
| extractperiod     | The year and month the prescriptions were dispensed                                                                                                                                                         |
| cgg_code          | The code of the CCG related to the practice                                                                                                                                                                 |
| practice_code     | The code of the practice                                                                                                                                                                                    |
| LSOA_code         | The code of the LSOA related to the practice                                                                                                                                                                |
| MSOA_code         | The code of the MSOA related to the practice                                                                                                                                                                |
| pack_code         | A unique code for each different pack of items                                                                                                                                                              |
| pack_name         | The name of the pack of items                                                                                                                                                                               |
| total_items       | The number of items for this presentation that were dispensed in the specified month. A prescription item refers to a single supply of a medicine, dressing or appliance prescribed on a prescription form. |
| total_quantity    | The quantity of a drug dispensed, measured in units depending on the formulation of the product, which is given in the drug name.                                                                           |
| total_actual_cost | Actual cost                                                                                                                                                                                                 |
| total_nic_cost    | The basic cost of a drug as used in primary care.                                                                                                                                                           |

Abbreviations: CCG, clinical commissioning group; LSOA, lower layer super output area; MSOA, middle layer super output area.

**Table S2: List of branded and unbranded oral anticoagulant items searched**

| pack_code       | pack_name                                  |
|-----------------|--------------------------------------------|
| 0208020Z0AAAAAA | Apixaban Tab 2.5mg                         |
| 0208020Z0AAABAB | Apixaban Tab 5mg                           |
| 0208020V0BDAAAC | Coumadin Tab 4mg                           |
| 0208020X0AAABAB | Dabigatran Etexilate Cap 110mg             |
| 0208020X0AAACAC | Dabigatran Etexilate Cap 150mg             |
| 0208020AAAAABAB | Edoxaban Tab 30mg                          |
| 0208020AAAAACAC | Edoxaban Tab 60mg                          |
| 0208020Z0BBAAAA | Eliquis Tab 2.5mg                          |
| 0208020Z0BBABAB | Eliquis Tab 5mg                            |
| 0208020A0BBABAB | Lixiana Tab 30mg                           |
| 0208020A0BBACAC | Lixiana Tab 60mg                           |
| 0208020V0BBAAAA | Marevan Tab 1mg                            |
| 0208020V0BBABAB | Marevan Tab 3mg                            |
| 0208020V0BBAFAS | Marevan Tab 500mcg                         |
| 0208020V0BBACAD | Marevan Tab 5mg                            |
| 0208020X0BBABAB | Pradaxa Cap 110mg                          |
| 0208020X0BBACAC | Pradaxa Cap 150mg                          |
| 0208020Y0AAAEAE | Rivaroxaban Init Tt/Pack (Tab 15mg/20mg)   |
| 0208020Y0AAAAAA | Rivaroxaban Tab 10mg                       |
| 0208020Y0AAABAB | Rivaroxaban Tab 15mg                       |
| 0208020Y0AAACAC | Rivaroxaban Tab 20mg                       |
| 0208020V0AABABA | Warfarin Sod Cap 1mg                       |
| 0208020V0AABCBC | Warfarin Sod Cap 3mg                       |
| 0208020V0AABDBD | Warfarin Sod Cap 5mg                       |
| 0208020V0AAARAR | Warfarin Sod Liq Spec 1.5mg/5ml            |
| 0208020V0AAAVAV | Warfarin Sod Liq Spec 10mg/5ml             |
| 0208020V0AAANAN | Warfarin Sod Liq Spec 1mg/5ml              |
| 0208020V0AAAKAK | Warfarin Sod Liq Spec 25mg/5ml             |
| 0208020V0AAAMAM | Warfarin Sod Liq Spec 3mg/5ml              |
| 0208020V0AAAXAX | Warfarin Sod Liq Spec 500mcg/5ml           |
| 0208020V0AAAIAI | Warfarin Sod Liq Spec 5mg/5ml              |
| 0208020V0AABBBB | Warfarin Sod Oral Susp 1mg/1ml S/F         |
| 0208020V0AAAZAZ | Warfarin Sod Oral Susp 5mg/5ml S/F         |
| 0208020V0AAAAAA | Warfarin Sod Tab 1mg                       |
| 0208020V0AAABAB | Warfarin Sod Tab 3mg                       |
| 0208020V0AAASAS | Warfarin Sod Tab 500mcg                    |
| 0208020V0AADAD  | Warfarin Sod Tab 5mg                       |
| 0208020Y0BBAEAE | Xarelto Initiation Tt/Pack (Tab 15mg/20mg) |
| 0208020Y0BBABAB | Xarelto Tab 15mg                           |
| 0208020Y0BBACAC | Xarelto Tab 20mg                           |

**Table S3: Net ingredient costs by year**

| Pack code       | Pack name                          | Year | Total actual cost | Total NIC cost | Average NIC cost per quantity |
|-----------------|------------------------------------|------|-------------------|----------------|-------------------------------|
| 0208020V0BDAAAC | Coumadin_Tab 4mg                   | 2011 | £41.83            | £45.36         | £0.81                         |
| 0208020X0AAABAB | Dabigatran Etexilate_Cap 110mg     | 2011 | £96,790.63        | £104,965.56    | £1.52                         |
| 0208020X0AAACAC | Dabigatran Etexilate_Cap 150mg     | 2011 | £29,007.53        | £31,443.30     | £1.26                         |
| 0208020Z0BBAAAA | Eliquis_Tab 2.5mg                  | 2011 | £94.86            | £102.90        | £1.72                         |
| 0208020V0BBAAAA | Marevan_Tab 1mg                    | 2011 | £14,730.84        | £15,315.61     | £0.01                         |
| 0208020V0BBABAB | Marevan_Tab 3mg                    | 2011 | £11,622.51        | £12,005.00     | £0.01                         |
| 0208020V0BBAFAS | Marevan_Tab 500mcg                 | 2011 | £5,327.00         | £5,566.41      | £0.02                         |
| 0208020V0BBACAD | Marevan_Tab 5mg                    | 2011 | £4,334.28         | £4,512.59      | £0.02                         |
| 0208020X0BBABAB | Pradaxa_Cap 110mg                  | 2011 | £10,945.17        | £11,872.14     | £1.57                         |
| 0208020X0BBACAC | Pradaxa_Cap 150mg                  | 2011 | £2,684.66         | £2,910.60      | £1.26                         |
| 0208020Y0AAAAAA | Rivaroxaban_Tab 10mg               | 2011 | £107,401.16       | £116,519.24    | £4.41                         |
| 0208020V0AAAVAV | Warfarin Sod_Liq Spec 10mg/5ml     | 2011 | £10,544.10        | £11,446.23     | £3.05                         |
| 0208020V0AAANAN | Warfarin Sod_Liq Spec 1mg/5ml      | 2011 | £32,418.55        | £35,179.54     | £0.85                         |
| 0208020V0AAAMAM | Warfarin Sod_Liq Spec 3mg/5ml      | 2011 | £6,503.51         | £7,056.87      | £0.99                         |
| 0208020V0AAAXAX | Warfarin Sod_Liq Spec 500mcg/5ml   | 2011 | £300.64           | £326.26        | £46.61                        |
| 0208020V0AAAIAI | Warfarin Sod_Liq Spec 5mg/5ml      | 2011 | £105,635.60       | £114,629.81    | £0.88                         |
| 0208020V0AABBBB | Warfarin Sod_Oral Susp 1mg/1ml S/F | 2011 | £36,231.28        | £39,299.93     | £0.61                         |
| 0208020V0AAAAAA | Warfarin Sod_Tab 1mg               | 2011 | £7,316,797.81     | £7,812,853.71  | £0.03                         |
| 0208020V0AAABAB | Warfarin Sod_Tab 3mg               | 2011 | £4,735,668.66     | £5,034,812.11  | £0.03                         |
| 0208020V0AAASAS | Warfarin Sod_Tab 500mcg            | 2011 | £1,400,697.09     | £1,498,575.66  | £0.06                         |
| 0208020V0AADAD  | Warfarin Sod_Tab 5mg               | 2011 | £1,803,552.37     | £1,917,182.43  | £0.03                         |
| 0208020Z0AAAAAA | Apixaban_Tab 2.5mg                 | 2012 | £1,702.71         | £1,845.34      | £1.72                         |
| 0208020Z0AAABAB | Apixaban_Tab 5mg                   | 2012 | £10.24            | £10.98         | £1.10                         |
| 0208020X0AAABAB | Dabigatran Etexilate_Cap 110mg     | 2012 | £1,365,766.79     | £1,479,726.58  | £1.11                         |
| 0208020X0AAACAC | Dabigatran Etexilate_Cap 150mg     | 2012 | £1,050,777.10     | £1,138,940.50  | £1.11                         |
| 0208020Z0BBAAAA | Eliquis_Tab 2.5mg                  | 2012 | £173.94           | £188.65        | £1.72                         |
| 0208020V0BBAAAA | Marevan_Tab 1mg                    | 2012 | £7,264.59         | £7,400.95      | £0.01                         |
| 0208020V0BBABAB | Marevan_Tab 3mg                    | 2012 | £5,077.32         | £4,921.21      | £0.01                         |
| 0208020V0BBAFAS | Marevan_Tab 500mcg                 | 2012 | £2,682.80         | £2,797.38      | £0.02                         |
| 0208020V0BBACAD | Marevan_Tab 5mg                    | 2012 | £2,395.42         | £2,396.19      | £0.02                         |
| 0208020X0BBABAB | Pradaxa_Cap 110mg                  | 2012 | £44,288.98        | £48,004.74     | £1.12                         |
| 0208020X0BBACAC | Pradaxa_Cap 150mg                  | 2012 | £43,545.77        | £47,207.18     | £1.12                         |
| 0208020Y0AAAAAA | Rivaroxaban_Tab 10mg               | 2012 | £129,432.17       | £140,193.90    | £2.10                         |
| 0208020Y0AAABAB | Rivaroxaban_Tab 15mg               | 2012 | £133,649.73       | £144,740.40    | £2.10                         |
| 0208020Y0AAACAC | Rivaroxaban_Tab 20mg               | 2012 | £433,698.22       | £470,015.70    | £2.10                         |
| 0208020V0AAARAR | Warfarin Sod_Liq Spec 1.5mg/5ml    | 2012 | £265.53           | £287.83        | £0.64                         |
| 0208020V0AAAVAV | Warfarin Sod_Liq Spec 10mg/5ml     | 2012 | £2,143.69         | £2,323.60      | £1.52                         |
| 0208020V0AAANAN | Warfarin Sod_Liq Spec 1mg/5ml      | 2012 | £24,641.96        | £26,714.29     | £0.70                         |
| 0208020V0AAAKAK | Warfarin Sod_Liq Spec 25mg/5ml     | 2012 | £166.21           | £180.00        | £0.90                         |
| 0208020V0AAAMAM | Warfarin Sod_Liq Spec 3mg/5ml      | 2012 | £5,699.09         | £6,177.51      | £1.11                         |
| 0208020V0AAAIAI | Warfarin Sod_Liq Spec 5mg/5ml      | 2012 | £67,370.22        | £73,018.60     | £0.64                         |

|                  |                                    |      |               |               |       |
|------------------|------------------------------------|------|---------------|---------------|-------|
| 0208020V0AABBBB  | Warfarin Sod_Oral Susp 1mg/1ml S/F | 2012 | £158,377.54   | £171,633.20   | £0.63 |
| 0208020V0AAAAAA  | Warfarin Sod_Tab 1mg               | 2012 | £7,493,887.04 | £7,965,249.11 | £0.03 |
| 0208020V0AAABAB  | Warfarin Sod_Tab 3mg               | 2012 | £4,922,239.44 | £5,218,729.39 | £0.03 |
| 0208020V0AAASAS  | Warfarin Sod_Tab 500mcg            | 2012 | £1,615,134.86 | £1,728,722.39 | £0.06 |
| 0208020V0AAADAD  | Warfarin Sod_Tab 5mg               | 2012 | £1,818,094.89 | £1,928,528.93 | £0.03 |
| 0208020Y0BBAAAA  | Xarelto_Tab 10mg                   | 2012 | £2,986.82     | £3,238.20     | £2.10 |
| 0208020Y0BBABAB  | Xarelto_Tab 15mg                   | 2012 | £2,076.60     | £2,251.20     | £2.10 |
| 0208020Y0BBACAC  | Xarelto_Tab 20mg                   | 2012 | £4,203.45     | £4,557.00     | £2.10 |
| 0208020Z0AAAAAA  | Apixaban_Tab 2.5mg                 | 2013 | £305,289.99   | £330,151.44   | £1.10 |
| 0208020Z0AAABAB  | Apixaban_Tab 5mg                   | 2013 | £429,664.98   | £465,215.18   | £1.10 |
| 0208020X0AAABAB  | Dabigatran Etexilate_Cap 110mg     | 2013 | £5,081,270.26 | £5,497,450.92 | £1.10 |
| 0208020X0AAACAC  | Dabigatran Etexilate_Cap 150mg     | 2013 | £4,173,322.29 | £4,517,603.53 | £1.10 |
| 0208020Z0BBAAAA  | Eliquis_Tab 2.5mg                  | 2013 | £3,796.50     | £4,109.59     | £1.11 |
| 0208020Z0BBABAB  | Eliquis_Tab 5mg                    | 2013 | £5,325.27     | £5,766.91     | £1.10 |
| 0208020V0BBAAAA  | Marevan_Tab 1mg                    | 2013 | £5,509.77     | £5,038.06     | £0.01 |
| 0208020V0BBABAB  | Marevan_Tab 3mg                    | 2013 | £3,429.42     | £3,151.00     | £0.01 |
| 0208020V0BBAFAS  | Marevan_Tab 500mcg                 | 2013 | £1,727.91     | £1,825.08     | £0.02 |
| 0208020V0BBACAD  | Marevan_Tab 5mg                    | 2013 | £1,880.21     | £1,914.15     | £0.02 |
| 0208020X0BBABAB  | Pradaxa_Cap 110mg                  | 2013 | £126,489.04   | £136,889.75   | £1.10 |
| 0208020X0BBACAC  | Pradaxa_Cap 150mg                  | 2013 | £106,785.51   | £115,619.78   | £1.10 |
| 0208020Y0AAAAAA  | Rivaroxaban_Tab 10mg               | 2013 | £515,178.20   | £557,350.50   | £2.10 |
| 0208020Y0AAABAB  | Rivaroxaban_Tab 15mg               | 2013 | £1,929,356.88 | £2,086,570.42 | £2.10 |
| 0208020Y0AAACAC  | Rivaroxaban_Tab 20mg               | 2013 | £6,418,074.45 | £6,946,188.08 | £2.10 |
| 0208020V0AAAVAV  | Warfarin Sod_Liq Spec 10mg/5ml     | 2013 | £955.01       | £1,035.12     | £1.15 |
| 0208020V0AAANAN  | Warfarin Sod_Liq Spec 1mg/5ml      | 2013 | £18,061.24    | £19,532.08    | £0.83 |
| 0208020V0AAAMAM  | Warfarin Sod_Liq Spec 3mg/5ml      | 2013 | £9,163.58     | £9,924.17     | £1.68 |
| 0208020V0AAAI AI | Warfarin Sod_Liq Spec 5mg/5ml      | 2013 | £23,584.39    | £25,542.16    | £0.66 |
| 0208020V0AABBBB  | Warfarin Sod_Oral Susp 1mg/1ml S/F | 2013 | £265,692.45   | £287,653.30   | £0.67 |
| 0208020V0AAAAAA  | Warfarin Sod_Tab 1mg               | 2013 | £8,331,757.74 | £8,868,974.88 | £0.03 |
| 0208020V0AAABAB  | Warfarin Sod_Tab 3mg               | 2013 | £5,473,786.61 | £5,827,333.26 | £0.03 |
| 0208020V0AAASAS  | Warfarin Sod_Tab 500mcg            | 2013 | £1,623,479.23 | £1,741,053.44 | £0.05 |
| 0208020V0AAADAD  | Warfarin Sod_Tab 5mg               | 2013 | £2,039,989.63 | £2,174,656.75 | £0.03 |
| 0208020Y0BBABAB  | Xarelto_Tab 15mg                   | 2013 | £17,051.10    | £18,459.00    | £2.10 |
| 0208020Y0BBACAC  | Xarelto_Tab 20mg                   | 2013 | £54,248.57    | £58,739.10    | £2.10 |
| 0208020Z0AAAAAA  | Apixaban_Tab 2.5mg                 | 2014 | £2,946,373.25 | £3,183,737.51 | £1.10 |
| 0208020Z0AAABAB  | Apixaban_Tab 5mg                   | 2014 | £4,862,297.07 | £5,260,055.26 | £1.10 |
| 0208020X0AAABAB  | Dabigatran Etexilate_Cap 110mg     | 2014 | £8,225,151.56 | £8,891,893.95 | £1.10 |
| 0208020X0AAACAC  | Dabigatran Etexilate_Cap 150mg     | 2014 | £7,378,700.74 | £7,981,123.95 | £1.10 |
| 0208020Z0BBAAAA  | Eliquis_Tab 2.5mg                  | 2014 | £31,324.08    | £33,876.74    | £1.10 |
| 0208020Z0BBABAB  | Eliquis_Tab 5mg                    | 2014 | £51,212.64    | £55,420.01    | £1.10 |
| 0208020V0BBAAAA  | Marevan_Tab 1mg                    | 2014 | £2,723.36     | £2,837.87     | £0.01 |

|                 |                                    |      |                |                |       |
|-----------------|------------------------------------|------|----------------|----------------|-------|
| 0208020V0BBABAB | Marevan_Tab 3mg                    | 2014 | £1,546.19      | £1,608.52      | £0.01 |
| 0208020V0BBAFAS | Marevan_Tab 500mcg                 | 2014 | £1,112.57      | £1,172.59      | £0.02 |
| 0208020V0BBACAD | Marevan_Tab 5mg                    | 2014 | £1,267.71      | £1,343.37      | £0.02 |
| 0208020X0BBABAB | Pradaxa_Cap 110mg                  | 2014 | £172,037.03    | £186,069.24    | £1.10 |
| 0208020X0BBACAC | Pradaxa_Cap 150mg                  | 2014 | £157,272.02    | £170,156.87    | £1.10 |
| 0208020Y0AAAAAA | Rivaroxaban_Tab 10mg               | 2014 | £1,148,266.65  | £1,240,912.00  | £2.10 |
| 0208020Y0AAABAB | Rivaroxaban_Tab 15mg               | 2014 | £6,304,555.23  | £6,813,703.80  | £2.10 |
| 0208020Y0AAACAC | Rivaroxaban_Tab 20mg               | 2014 | £24,085,542.40 | £26,049,070.89 | £2.10 |
| 0208020V0AAAVAV | Warfarin_Sod_Liq_Spec 10mg/5ml     | 2014 | £134.25        | £145.25        | £1.45 |
| 0208020V0AAANAN | Warfarin_Sod_Liq_Spec 1mg/5ml      | 2014 | £14,330.22     | £15,509.84     | £0.90 |
| 0208020V0AAAMAM | Warfarin_Sod_Liq_Spec 3mg/5ml      | 2014 | £3,249.01      | £3,516.67      | £1.71 |
| 0208020V0AAAI   | Warfarin_Sod_Liq_Spec 5mg/5ml      | 2014 | £19,455.42     | £21,056.64     | £0.67 |
| 0208020V0AABBBB | Warfarin_Sod_Oral_Susp 1mg/1ml S/F | 2014 | £320,390.77    | £346,722.18    | £0.68 |
| 0208020V0AAAAAA | Warfarin_Sod_Tab 1mg               | 2014 | £9,156,369.29  | £9,756,687.22  | £0.03 |
| 0208020V0AAABAB | Warfarin_Sod_Tab 3mg               | 2014 | £6,046,624.33  | £6,444,947.58  | £0.03 |
| 0208020V0AAASAS | Warfarin_Sod_Tab 500mcg            | 2014 | £1,614,710.91  | £1,729,830.40  | £0.05 |
| 0208020V0AADAD  | Warfarin_Sod_Tab 5mg               | 2014 | £2,168,892.17  | £2,313,984.36  | £0.03 |
| 0208020Y0BBABAB | Xarelto_Tab 15mg                   | 2014 | £35,530.13     | £38,381.18     | £2.10 |
| 0208020Y0BBACAC | Xarelto_Tab 20mg                   | 2014 | £159,560.49    | £172,634.70    | £2.10 |
| 0208020Z0AAAAAA | Apixaban_Tab 2.5mg                 | 2015 | £12,559,168.05 | £13,558,978.08 | £1.10 |
| 0208020Z0AAABAB | Apixaban_Tab 5mg                   | 2015 | £21,441,713.57 | £23,172,232.63 | £1.10 |
| 0208020X0AAABAB | Dabigatran_Etexilate_Cap 110mg     | 2015 | £10,436,987.39 | £11,273,101.25 | £1.10 |
| 0208020X0AAACAC | Dabigatran_Etexilate_Cap 150mg     | 2015 | £9,977,159.26  | £10,783,047.08 | £1.10 |
| 0208020AAAAABAB | Edoxaban_Tab 30mg                  | 2015 | £2,433.23      | £2,631.30      | £2.10 |
| 0208020AAAAACAC | Edoxaban_Tab 60mg                  | 2015 | £6,478.33      | £7,005.60      | £2.10 |
| 0208020Z0BBAAAA | Eliquis_Tab 2.5mg                  | 2015 | £76,458.45     | £82,631.57     | £1.10 |
| 0208020Z0BBABAB | Eliquis_Tab 5mg                    | 2015 | £136,101.97    | £147,166.79    | £1.10 |
| 0208020AABBABAB | Lixiana_Tab 30mg                   | 2015 | £217.44        | £235.20        | £2.10 |
| 0208020AABBACAC | Lixiana_Tab 60mg                   | 2015 | £231.16        | £249.90        | £2.10 |
| 0208020V0BBAAAA | Marevan_Tab 1mg                    | 2015 | £1,607.05      | £1,669.23      | £0.01 |
| 0208020V0BBABAB | Marevan_Tab 3mg                    | 2015 | £792.22        | £822.76        | £0.01 |
| 0208020V0BBAFAS | Marevan_Tab 500mcg                 | 2015 | £296.27        | £306.73        | £0.02 |
| 0208020V0BBACAD | Marevan_Tab 5mg                    | 2015 | £713.13        | £755.89        | £0.02 |
| 0208020X0BBABAB | Pradaxa_Cap 110mg                  | 2015 | £200,514.39    | £216,614.82    | £1.10 |
| 0208020X0BBACAC | Pradaxa_Cap 150mg                  | 2015 | £197,012.18    | £212,926.15    | £1.10 |
| 0208020Y0AAAAAA | Rivaroxaban_Tab 10mg               | 2015 | £1,788,452.17  | £1,931,242.28  | £2.10 |
| 0208020Y0AAABAB | Rivaroxaban_Tab 15mg               | 2015 | £14,747,385.83 | £15,923,772.83 | £2.10 |
| 0208020Y0AAACAC | Rivaroxaban_Tab 20mg               | 2015 | £60,254,466.48 | £65,110,866.64 | £2.10 |

|                  |                                    |      |                |                |       |
|------------------|------------------------------------|------|----------------|----------------|-------|
| 0208020V0AAAVAV  | Warfarin Sod_Liq Spec 10mg/5ml     | 2015 | £754.58        | £815.55        | £1.63 |
| 0208020V0AAANAN  | Warfarin Sod_Liq Spec 1mg/5ml      | 2015 | £16,233.00     | £17,560.14     | £0.96 |
| 0208020V0AAAMAM  | Warfarin Sod_Liq Spec 3mg/5ml      | 2015 | £4,179.75      | £4,518.91      | £2.60 |
| 0208020V0AAAI AI | Warfarin Sod_Liq Spec 5mg/5ml      | 2015 | £16,915.22     | £18,288.96     | £0.67 |
| 0208020V0AABBBB  | Warfarin Sod_Oral Susp 1mg/1ml S/F | 2015 | £370,726.01    | £400,863.66    | £0.71 |
| 0208020V0AAAAAA  | Warfarin Sod_Tab 1mg               | 2015 | £10,116,612.65 | £10,794,441.55 | £0.04 |
| 0208020V0AAABAB  | Warfarin Sod_Tab 3mg               | 2015 | £6,615,693.30  | £7,059,274.51  | £0.04 |
| 0208020V0AAASAS  | Warfarin Sod_Tab 500mcg            | 2015 | £2,054,698.83  | £2,204,343.88  | £0.06 |
| 0208020V0AADAD   | Warfarin Sod_Tab 5mg               | 2015 | £2,344,307.00  | £2,503,466.16  | £0.04 |
| 0208020Y0BBABAB  | Xarelto_Tab 15mg                   | 2015 | £55,438.95     | £59,923.50     | £2.10 |
| 0208020Y0BBACAC  | Xarelto_Tab 20mg                   | 2015 | £274,561.27    | £296,818.20    | £2.10 |
| 0208020Z0AAAAAA  | Apixaban_Tab 2.5mg                 | 2016 | £28,348,440.87 | £30,558,980.27 | £0.98 |
| 0208020Z0AAABAB  | Apixaban_Tab 5mg                   | 2016 | £49,140,358.73 | £53,036,316.79 | £0.98 |
| 0208020X0AAABAB  | Dabigatran Etexilate_Cap 110mg     | 2016 | £9,359,760.82  | £10,095,766.47 | £0.87 |
| 0208020X0AAACAC  | Dabigatran Etexilate_Cap 150mg     | 2016 | £9,278,074.49  | £10,013,798.09 | £0.87 |
| 0208020AAAAABAB  | Edoxaban_Tab 30mg                  | 2016 | £196,157.27    | £211,625.35    | £1.87 |
| 0208020AAAAACAC  | Edoxaban_Tab 60mg                  | 2016 | £390,656.07    | £421,644.00    | £1.87 |
| 0208020Z0BBAAAA  | Eliquis_Tab 2.5mg                  | 2016 | £117,012.44    | £126,289.27    | £0.98 |
| 0208020Z0BBABAB  | Eliquis_Tab 5mg                    | 2016 | £199,170.20    | £215,089.37    | £0.98 |
| 0208020AABBABAB  | Lixiana_Tab 30mg                   | 2016 | £1,134.99      | £1,220.50      | £1.86 |
| 0208020AABBACAC  | Lixiana_Tab 60mg                   | 2016 | £6,043.01      | £6,520.85      | £1.87 |
| 0208020V0BBAAAA  | Marevan_Tab 1mg                    | 2016 | £1,072.92      | £1,111.39      | £0.01 |
| 0208020V0BBABAB  | Marevan_Tab 3mg                    | 2016 | £482.74        | £503.84        | £0.01 |
| 0208020V0BBAFAS  | Marevan_Tab 500mcg                 | 2016 | £189.95        | £143.79        | £0.02 |
| 0208020V0BBACAD  | Marevan_Tab 5mg                    | 2016 | £462.27        | £489.50        | £0.02 |
| 0208020X0BBABAB  | Pradaxa_Cap 110mg                  | 2016 | £190,892.06    | £205,991.68    | £0.87 |
| 0208020X0BBACAC  | Pradaxa_Cap 150mg                  | 2016 | £188,497.84    | £203,488.10    | £0.87 |
| 0208020Y0AAAAAA  | Rivaroxaban_Tab 10mg               | 2016 | £1,812,363.62  | £1,952,940.60  | £1.80 |
| 0208020Y0AAABAB  | Rivaroxaban_Tab 15mg               | 2016 | £21,244,497.77 | £22,906,752.06 | £1.80 |
| 0208020Y0AAACAC  | Rivaroxaban_Tab 20mg               | 2016 | £88,201,254.67 | £95,178,660.29 | £1.80 |
| 0208020V0AABABA  | Warfarin Sod_Cap 1mg               | 2016 | £553.84        | £597.70        | £5.34 |
| 0208020V0AABCBC  | Warfarin Sod_Cap 3mg               | 2016 | £416.20        | £449.15        | £5.35 |
| 0208020V0AABDBD  | Warfarin Sod_Cap 5mg               | 2016 | £417.98        | £451.07        | £5.37 |
| 0208020V0AAAVAV  | Warfarin Sod_Liq Spec 10mg/5ml     | 2016 | £622.97        | £673.53        | £3.37 |
| 0208020V0AAANAN  | Warfarin Sod_Liq Spec 1mg/5ml      | 2016 | £17,877.27     | £19,312.44     | £1.60 |
| 0208020V0AAAMAM  | Warfarin Sod_Liq Spec 3mg/5ml      | 2016 | £2,167.76      | £2,342.30      | £2.10 |
| 0208020V0AAAI AI | Warfarin Sod_Liq Spec 5mg/5ml      | 2016 | £20,017.25     | £21,619.99     | £0.86 |
| 0208020V0AABBBB  | Warfarin Sod_Oral Susp 1mg/1ml S/F | 2016 | £394,940.56    | £426,457.06    | £0.71 |
| 0208020V0AAAAAA  | Warfarin Sod_Tab 1mg               | 2016 | £7,444,274.10  | £7,909,769.95  | £0.03 |
| 0208020V0AAABAB  | Warfarin Sod_Tab 3mg               | 2016 | £4,954,743.30  | £5,266,009.02  | £0.03 |
| 0208020V0AAASAS  | Warfarin Sod_Tab 500mcg            | 2016 | £1,826,565.45  | £1,956,584.95  | £0.06 |
| 0208020V0AADAD   | Warfarin Sod_Tab 5mg               | 2016 | £1,787,198.52  | £1,901,950.12  | £0.03 |
| 0208020Y0BBABAB  | Xarelto_Tab 15mg                   | 2016 | £55,259.92     | £59,385.60     | £1.80 |
| 0208020Y0BBACAC  | Xarelto_Tab 20mg                   | 2016 | £321,438.57    | £347,070.60    | £1.80 |
| 0208020Z0AAAAAA  | Apixaban_Tab 2.5mg                 | 2017 | £47,728,042.34 | £51,441,367.53 | £0.95 |

|                  |                                            |      |                 |                 |       |
|------------------|--------------------------------------------|------|-----------------|-----------------|-------|
| 0208020Z0AAABAB  | Apixaban_Tab 5mg                           | 2017 | £90,801,825.12  | £97,991,344.40  | £0.95 |
| 0208020X0AAABAB  | Dabigatran Etexilate_Cap 110mg             | 2017 | £10,017,961.81  | £10,800,484.15  | £0.85 |
| 0208020X0AAACAC  | Dabigatran Etexilate_Cap 150mg             | 2017 | £10,497,719.89  | £11,326,281.98  | £0.85 |
| 0208020AAAAABAB  | Edoxaban_Tab 30mg                          | 2017 | £1,538,819.99   | £1,660,370.90   | £1.80 |
| 0208020AAAAACAC  | Edoxaban_Tab 60mg                          | 2017 | £2,668,698.85   | £2,880,697.80   | £1.80 |
| 0208020Z0BBAAAA  | Eliquis_Tab 2.5mg                          | 2017 | £132,526.55     | £142,998.03     | £0.95 |
| 0208020Z0BBABAB  | Eliquis_Tab 5mg                            | 2017 | £254,521.77     | £274,818.85     | £0.95 |
| 0208020AABBABAB  | Lixiana_Tab 30mg                           | 2017 | £6,709.36       | £7,243.45       | £1.80 |
| 0208020AABBACAC  | Lixiana_Tab 60mg                           | 2017 | £23,842.98      | £25,739.35      | £1.80 |
| 0208020V0BBAAAA  | Marevan_Tab 1mg                            | 2017 | £684.95         | £713.00         | £0.01 |
| 0208020V0BBABAB  | Marevan_Tab 3mg                            | 2017 | £315.57         | £330.74         | £0.01 |
| 0208020V0BBAFAS  | Marevan_Tab 500mcg                         | 2017 | £26.89          | £25.28          | £0.04 |
| 0208020V0BBACAD  | Marevan_Tab 5mg                            | 2017 | £229.19         | £243.47         | £0.02 |
| 0208020X0BBABAB  | Pradaxa_Cap 110mg                          | 2017 | £200,474.18     | £216,262.51     | £0.85 |
| 0208020X0BBACAC  | Pradaxa_Cap 150mg                          | 2017 | £189,964.65     | £205,033.50     | £0.85 |
| 0208020Y0AAAEAE  | Rivaroxaban_Init Tt/Pack (Tab 15mg/20mg)   | 2017 | £4,247.79       | £4,586.40       | £1.80 |
| 0208020Y0AAAAAA  | Rivaroxaban_Tab 10mg                       | 2017 | £1,999,171.77   | £2,154,878.80   | £1.80 |
| 0208020Y0AAABAB  | Rivaroxaban_Tab 15mg                       | 2017 | £29,204,926.81  | £31,489,923.75  | £1.80 |
| 0208020Y0AAADAD  | Rivaroxaban_Tab 2.5mg                      | 2017 | £228,116.09     | £246,069.00     | £0.90 |
| 0208020Y0AAACAC  | Rivaroxaban_Tab 20mg                       | 2017 | £117,232,779.43 | £126,499,957.45 | £1.80 |
| 0208020V0AAANAN  | Warfarin Sod_Liq Spec 1mg/5ml              | 2017 | £29,954.43      | £32,347.61      | £2.74 |
| 0208020V0AAAMAM  | Warfarin Sod_Liq Spec 3mg/5ml              | 2017 | £1,385.28       | £1,495.36       | £2.49 |
| 0208020V0AAAI AI | Warfarin Sod_Liq Spec 5mg/5ml              | 2017 | £17,550.98      | £18,951.83      | £0.82 |
| 0208020V0AABBBB  | Warfarin Sod_Oral Susp 1mg/1ml S/F         | 2017 | £405,932.20     | £438,301.44     | £0.71 |
| 0208020V0AAAAAAA | Warfarin Sod_Tab 1mg                       | 2017 | £5,627,743.02   | £5,963,979.35   | £0.02 |
| 0208020V0AAABAB  | Warfarin Sod_Tab 3mg                       | 2017 | £3,770,827.05   | £3,997,575.12   | £0.03 |
| 0208020V0AAASAS  | Warfarin Sod_Tab 500mcg                    | 2017 | £1,468,743.31   | £1,571,917.39   | £0.05 |
| 0208020V0AAADAD  | Warfarin Sod_Tab 5mg                       | 2017 | £1,387,279.70   | £1,472,537.27   | £0.03 |
| 0208020Y0BBAEAE  | Xarelto_Initiation Tt/Pack (Tab 15mg/20mg) | 2017 | £3,266.95       | £3,528.00       | £1.80 |
| 0208020Y0BBABAB  | Xarelto_Tab 15mg                           | 2017 | £59,613.76      | £64,315.80      | £1.80 |
| 0208020Y0BBACAC  | Xarelto_Tab 20mg                           | 2017 | £356,362.50     | £384,685.20     | £1.80 |

**Table S4: Numbers of patients with AF and AF-related strokes, by year**

| Calendar year | Total AF patients | Total AF-related stroke patients |
|---------------|-------------------|----------------------------------|
| 2011          | 470,877           | 92,478                           |
| 2012          | 496,862           | 93,860                           |
| 2013          | 522,003           | 94,684                           |
| 2014*         | 541,031           | 91,762                           |
| 2015          | 583,873           | 96,359                           |
| 2016          | 612,752           | 97,924                           |
| 2017          | 644,283           | 99,453                           |

\*50% of the 2014 values were included in the study period 2011–2014, and 50% in the period 2014–2017.

**Table S5: Proportions of warfarin prescribed for AF and other conditions, by year**

| Calendar year | Prevalence of AF (%) | Prevalence of VTE* (%) | Prevalence of other conditions <sup>†</sup> (%) | % of OAC prescription among AF | % of total OAC prescribed to AF |
|---------------|----------------------|------------------------|-------------------------------------------------|--------------------------------|---------------------------------|
| 2011          | 1.5                  | 0.3                    | 0.37                                            | 50.0                           | 51.9                            |
| 2012          | 1.5                  | 0.3                    | 0.37                                            | 51.5                           | 53.4                            |
| 2013          | 1.5                  | 0.3                    | 0.37                                            | 54.4                           | 55.4                            |
| 2014          | 1.6                  | 0.3                    | 0.37                                            | 59.0                           | 58.1                            |
| 2015          | 1.7                  | 0.3                    | 0.37                                            | 64.9                           | 61.5                            |
| 2016          | 1.7                  | 0.3                    | 0.37                                            | 68.3                           | 63.8                            |
| 2017          | 1.8                  | 0.3                    | 0.37                                            | 71.4                           | 65.6                            |

\*New VTE and VTE needing long-term anticoagulation. <sup>†</sup>Chronic rheumatic heart disease, antiphospholipid syndrome, cardiomyopathy, and prosthetic heart valve.



**Table S6: Numbers of GP practices in England per year**

|                      | <b>Total GP practices</b> |
|----------------------|---------------------------|
| <b>Calendar year</b> |                           |
| 2011                 | 8,791                     |
| 2012                 | 8,665                     |
| 2013                 | 8,645                     |
| 2014                 | 8,612                     |
| 2015                 | 8,598                     |
| 2016                 | 8,522                     |
| 2017                 | 8,375                     |
| <b>QOF year</b>      |                           |
| 2011                 | 8,949                     |
| 2012                 | 8,844                     |
| 2013                 | 9,634                     |
| 2014                 | 9,502                     |
| 2015                 | 7,619                     |
| 2016                 | 7,392                     |
| 2017                 | 7,100                     |

**Figure S1. Time trend of AF-prevalence-adjusted stroke incidence 2011–2017, by CCG**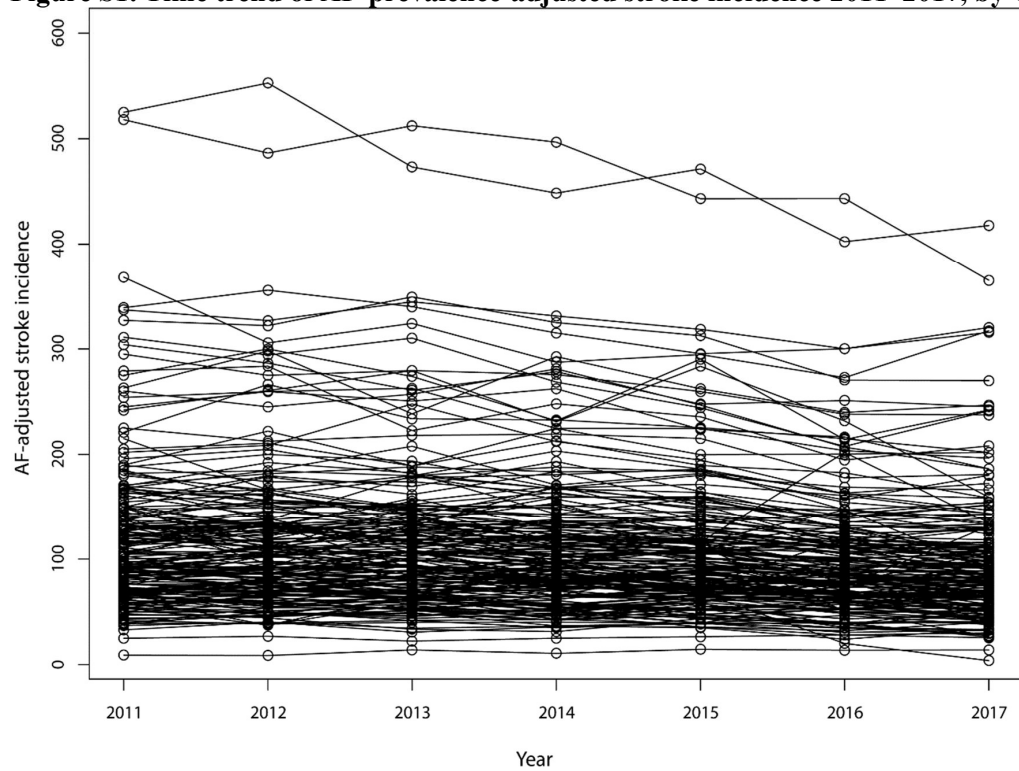

**Figure S2. Box and whisker plots of AF-prevalence-adjusted stroke incidence 2011–2017, by year**

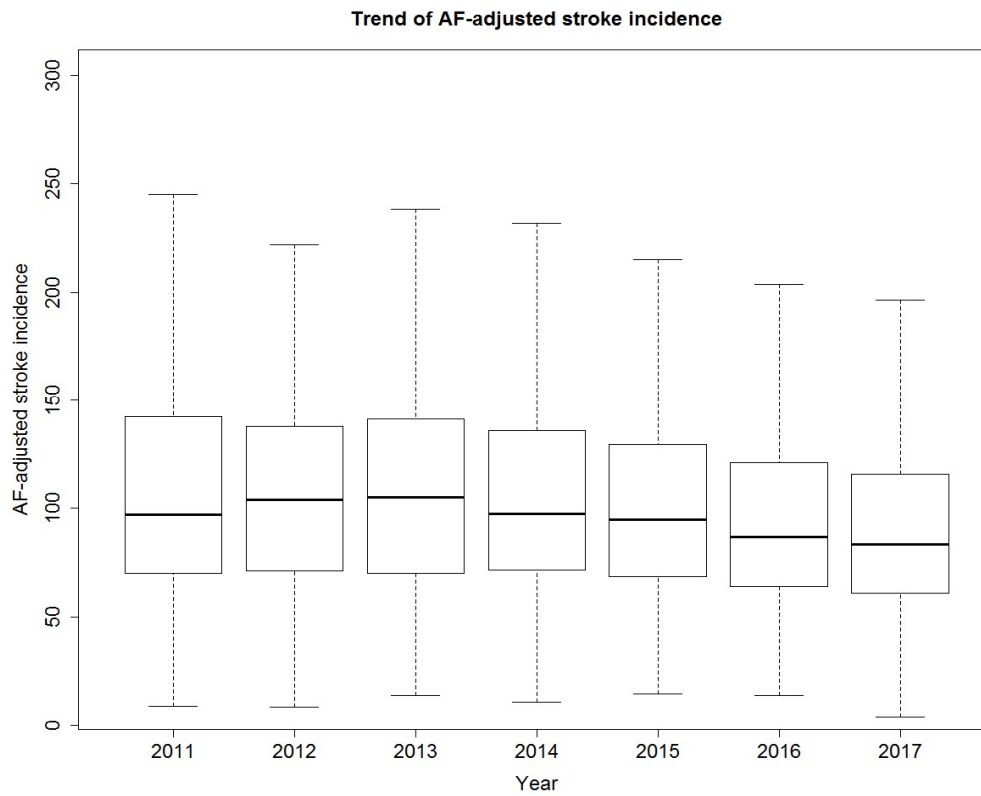

Supplement: heartjnl-2020-317006supp001.pdf [file heartjnl-2020-317006supp001.pdf]
